# Supplementary material
Source: publisher figshare collection journal article supplement (https://springernature.figshare.com/ndownloader/files/13011506)
Supplement: Supplementary file 1 [file 13011506]

Appendix Figure 2. Labor market status, as reported contemporaneously for 1998 and as reported retrospectively for 1998 from 2006 retrospective data, by sex, individuals ages 20-44 in 1998 and present in both waves (percentage)

|  | |
| --- | --- |
|  |  |

Source: Authors’ calculations based on ELMPS 1998 and ELMPS 2006
